# Supplementary material for: Agrobacterium tumefaciens Small Lipoprotein Atu8019 Is Involved in Selective Outer Membrane Vesicle (OMV) Docking to Bacterial Cells
Source: PubMed Central journal article supplement (PMC7296081; doi:10.3389/fmicb.2020.01228), 2020-06-09
Supplement: Data_Sheet_1.pdf [file Data_Sheet_1.pdf]

## Supplementary Material

### Supplementary Figures

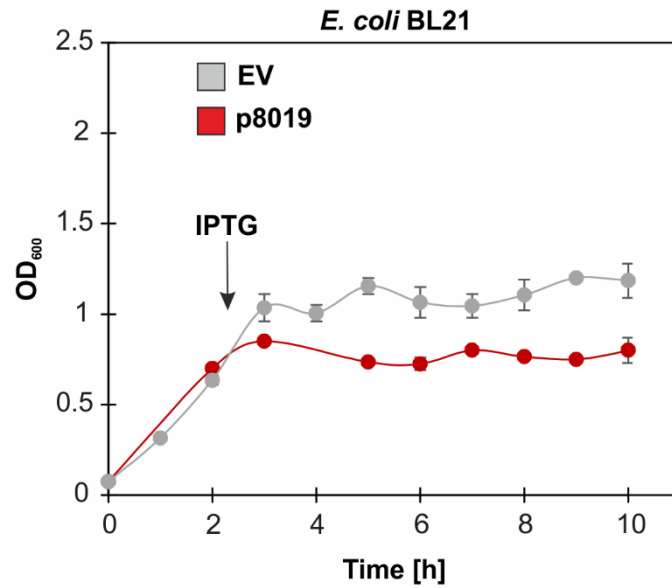

**Supplementary Figure 1. Overproduction of Atu8019<sup>HIS</sup> in *E. coli* does not cause cell lysis.** Growth analysis of Atu8019<sup>HIS</sup> overproduction strain (p8019) in LB medium at 30°C. Protein expression was induced after cultivation at 37°C at an OD<sub>600</sub> of 0.6 by addition of 0.4 mM IPTG. *E. coli* cells carrying the empty vector (EV, pET24b) served as negative control.

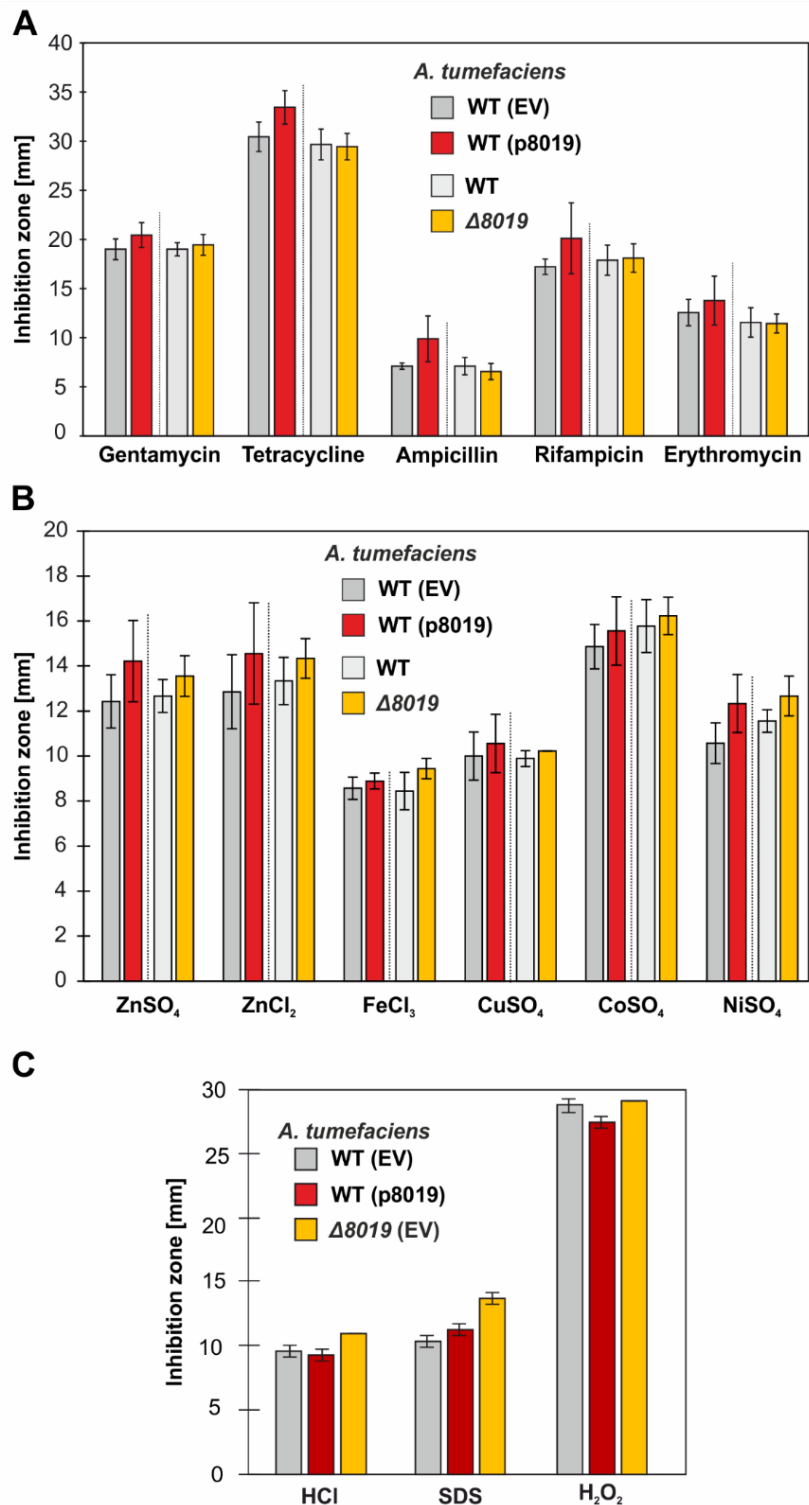

**Supplementary Figure 2. Deletion or overexpression of *atu8019* does not influence stress tolerance in *A. tumefaciens*.** Tolerance to different stressors of *atu8019* deletion ( $\Delta 8019$ ) and *atu8019* overexpression strains (p8019) determined by agar diffusion assays. Overexpression strain and empty vector containing strains (EV; pTrc200) were cultivated in LB medium with appropriate antibiotics to an OD<sub>600</sub> of 0.5 before expression was induced (0.1 mM IPTG) and the cultures were further incubated for 3 h at 30°C. *A. tumefaciens* WT and the *atu8019* deletion strain were cultivated for 6 h at 30°C in LB medium. Equal amounts of cells were plated on LB-agar plates (containing 0.1 mM IPTG and appropriate antibiotics for p8019 and EV strains) before filter discs were placed on the plates. We used 1  $\mu$ L of antibiotic stock solutions (gentamycin [30  $\mu$ g/mL], tetracycline [30  $\mu$ g/mL], ampicillin [25  $\mu$ g/mL], rifampicin [5  $\mu$ g/mL], erythromycin [5  $\mu$ g/mL]) and 3  $\mu$ L of 1M ion stock solutions (1M), HCl (2 M), SDS (10%) and H<sub>2</sub>O<sub>2</sub> (5.5 M). Inhibition zones were determined after 2 days of cultivation at 30°C. Values are averages of triplicate assays and error bars are standard deviations

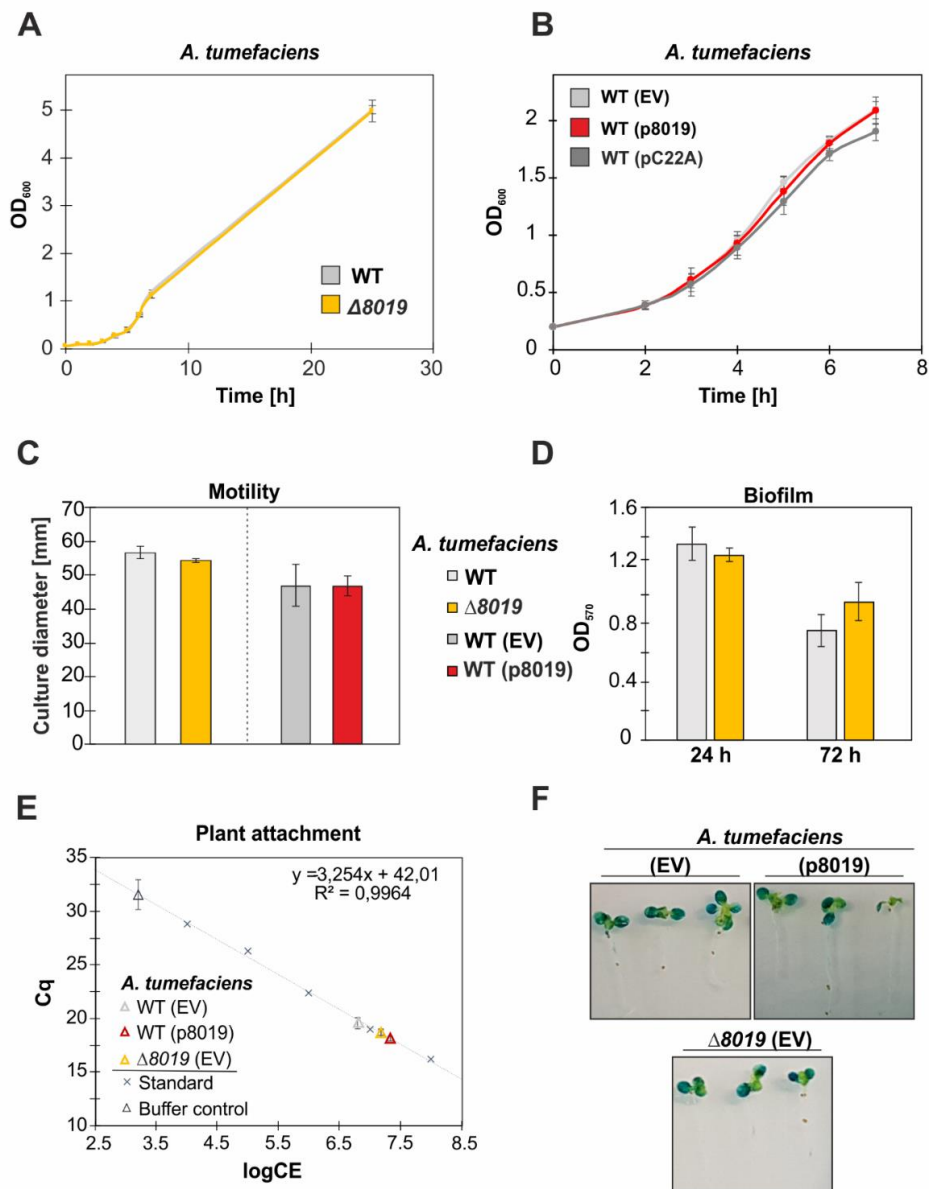

**Supplementary Figure 3. Deletion of *atu8019* has no impact on motility, biofilm formation, plant attachment and transformation capacity of *A. tumefaciens*.** (A) and (B) Growth of different *A. tumefaciens* strains in LB medium at 30°C. Overexpression strains (p8019 and pC22A) and empty vector containing strains (EV; pTrc200) were cultivated in LB medium with appropriate antibiotics and 0.1 mM IPTG. (C) Motility of *A. tumefaciens* *atu8019* deletion and overexpression strains on M9 soft agar plates with 0.25% (w/v) agar. Cultures were grown in LB medium (with 0.1 mM IPTG and appropriate antibiotic for p8019 and EV strains) at 30°C for 6 h. Cells were washed and 10  $\mu$ l were spotted on soft agar plates and incubated for 72 h at 30°C before motility diameter was measured. Values are averages of triplicates and error bars are standard deviations. (D) Determination of biofilm formation of *A. tumefaciens* WT and  $\Delta 8019$  strain by crystal violet assay. Values are averages of quintuplicate assays and error bars are standard deviations. (E) qPCR-based quantification of *A. tumefaciens* attachment to *Arabidopsis thaliana* roots. *A. tumefaciens* WT and  $\Delta 8019$  strains carrying the empty vector (EV) or the pTrc-*atu8019*-expression plasmid (p8019) were grown in LB medium supplemented with 0.1 mM IPTG for 5 at 30°C. Cells ( $10^8$ ) were incubated with 10 root fragments of *A. thaliana* Columbia-0 and root-bound bacteria were quantified by qPCR as described in Material and Methods. Results are presented as Cq-values compared to  $\log_{10}$  of cell equivalents (CE). Values are averages of triplicates and error bars are standard deviations. (F) *Agrobacterium*-mediated transient transformation of *Arabidopsis* seedlings. DNA transfer capability of different *A. tumefaciens* strains into *A. thaliana* was analyzed as described by Wu et al. (Wu et al., 2014). Briefly, 7-day old *A. thaliana efr-1* seedlings were incubated with *A. tumefaciens* WT and *atu8019* deletion strain carrying the empty vector (EV) or *atu8019*-overexpression (p8019) plasmid for three days. All strains carried the pBISN1 plasmid, encoding for the *gusA* intron. Afterwards, GUS activity was analyzed by GUS staining. One representative result out of three independent triplicates is shown for each strain.

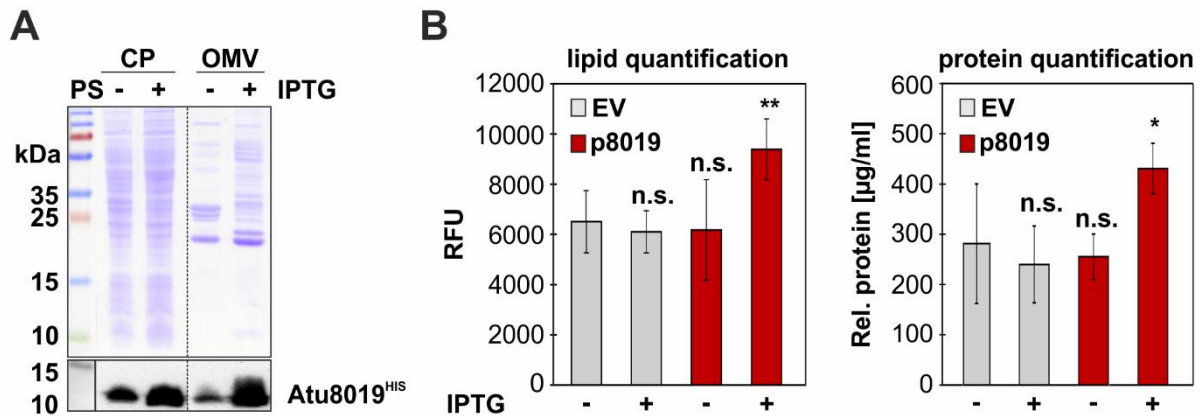

**Supplementary Figure 4. Overproduction of *Atu8019* in *A. tumefaciens* increases OMV formation.** (A) Enrichment of *Atu8019*<sup>HIS</sup> in *A. tumefaciens* OMVs by plasmid-based overproduction. *A. tumefaciens* WT carrying the empty vector (EV) or the *atu8019*-overexpression plasmid (p8019) were cultivated in LB medium for 24 h at 30°C with or without IPTG induction. Proteins from cell pellet (CP) and isolated OMVs were analyzed by SDS-PAGE and Western blot. *Atu8019*<sup>HIS</sup> was detected using anti-HIS antibodies. (B) Influence of *Atu8019* overproduction on OMV formation. OMV yields were quantified by determination of their lipid content by FM4-64 labelling. Fluorescence was recorded at 705 nm following excitation at 525 nm. The absolute fluorescence was normalized to the OD<sub>600</sub> of the respective culture, to obtain relative fluorescence units (RFU). As a second approach to quantify OMV yields, concentration of OMV-proteins was determined using BCA assay and protein-concentration was normalized to OD<sub>600</sub> of the OMV-producing culture. Values are averages of triplicates and error bars are standard deviations. PS, protein standard. The P-values noted a \* are less than 0.05, \*\* are less than 0.01 and \*\*\* are less than 0.001. Statistical testing was performed in Excel using T-test with unequal variance and two-tail hypothesis. n.s., not significant.

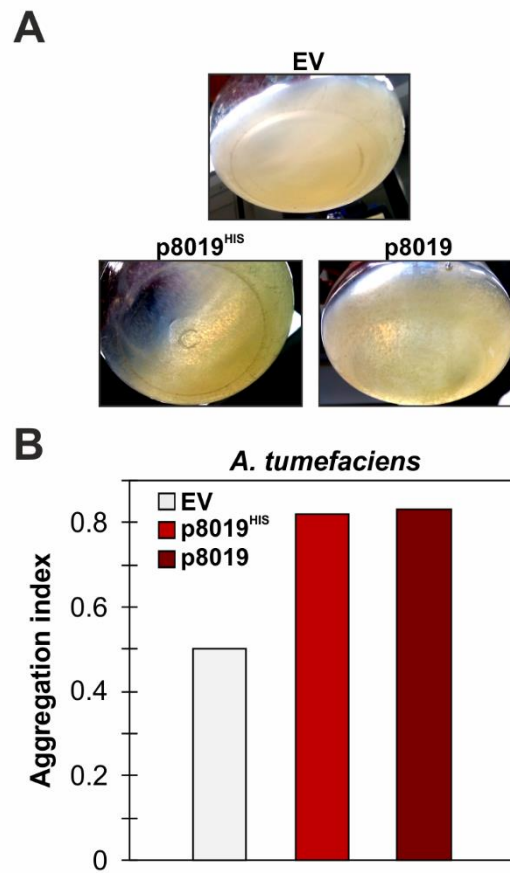

**Supplementary Figure 5. The C-terminal HIS-tag does not compromise Atu8019 function.** (A) Visible cell clumps of *atu8019* overexpression strains in liquid culture. Recombinant Atu8019 was overproduced as a C-terminal HIS-tagged and tag-less version in *A. tumefaciens* WT and the Aggregation index (B) was determined as described in Fig. 4. WT strain containing the empty vector (EV, pTrc200) served as control.

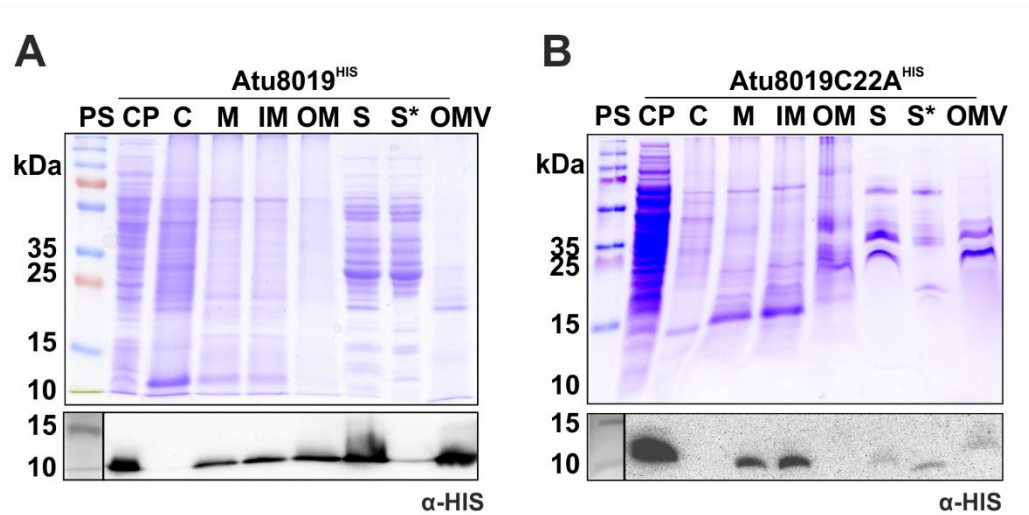

**Supplementary Figure 6. The Cys22 residue is required for Atu8019 exposure and packing into OMVs.** SDS-PAGE and Western blot analysis of different cell fractions from *A. tumefaciens* strains producing Atu8019<sup>HIS</sup> (**A**) and Atu8019C22A<sup>HIS</sup> (**B**). Cells were cultivated in LB medium to an OD<sub>600</sub> of 0.6 and induced with 0.4 mM IPTG overnight. Cells were harvested, disrupted and separated into cytosolic (C) and membrane fraction (M) by ultracentrifugation. The membrane fraction was treated with *N*-lauroylsarcosine for separation into inner and outer membranes (IM/OM). For the extracellular localization of the proteins, the cell-free culture supernatant (S) was fractionated into secreted soluble proteins (S\*) and OMV-associated proteins (OMV) by ultracentrifugation. Atu8019 derivatives were detected with anti-HIS antibodies. CP, cell pellet; PS, protein standard.

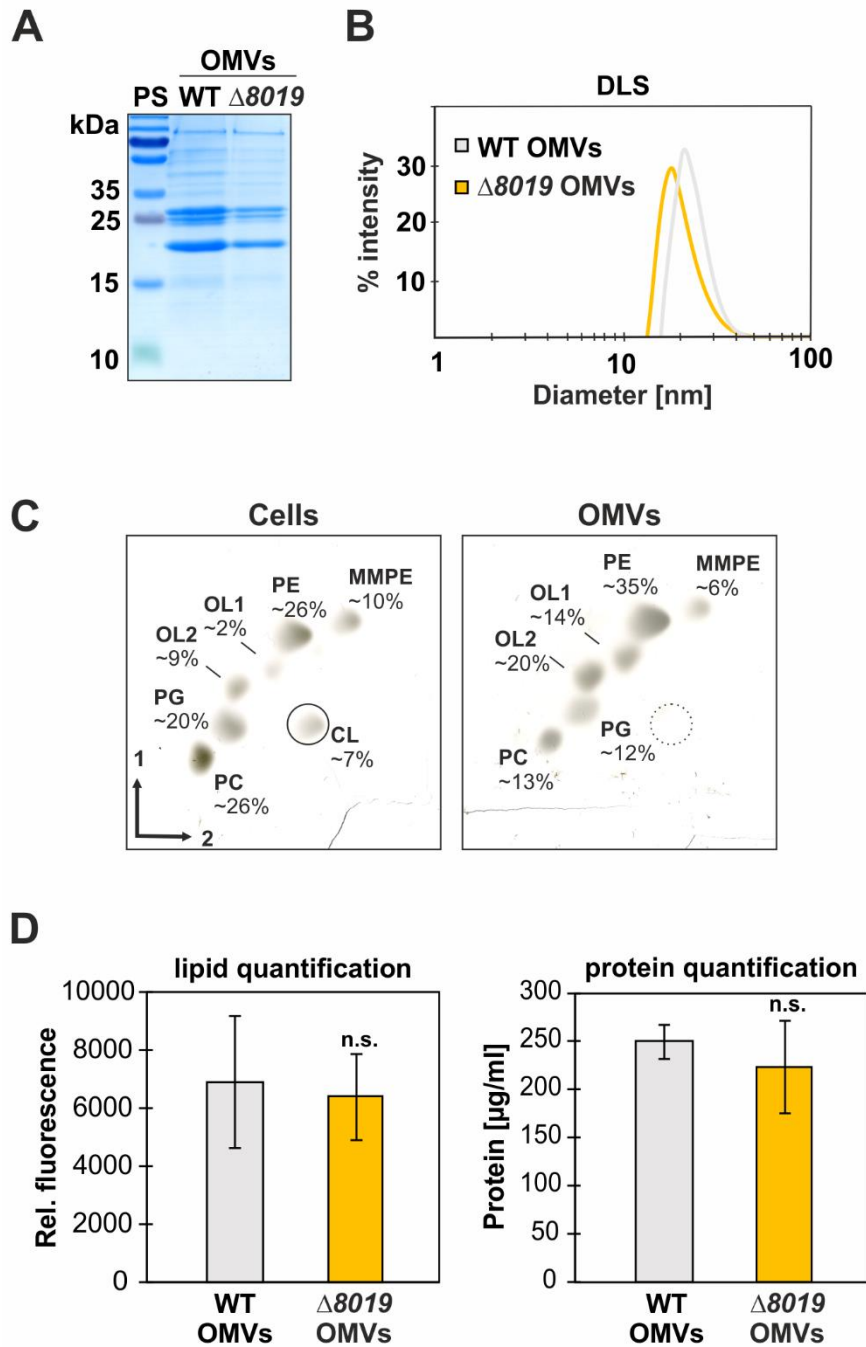

**Supplementary Figure 7. Deletion of *atu8019* does not influence OMV production and properties.** (A) Comparative SDS-PAGE analysis of OMV proteins secreted by *A. tumefaciens* WT and  $\Delta 8019$  strain. (B) Size distribution of OMVs determined by dynamic light scattering. (C) Analysis of cellular and OMV lipids by 2-dimensional TLC. Lipids were visualized and quantitated by copper (II) sulfate charring. (D) Quantification of OMV production by determination of lipid and protein concentration as described in Material and Methods. Values are averages from three independent biological replicates. Error bars represent standard deviations. CL, cardiolipin; PE, phosphatidylethanolamine; MMPE, monomethyl-PE; PC, phosphatidylcholine; PG, phosphatidylglycerol; OL1/2, ornithine lipids 1/2. Statistical testing was performed in Excel using T-test with unequal variance and two-tail hypothesis. n.s., not significant.

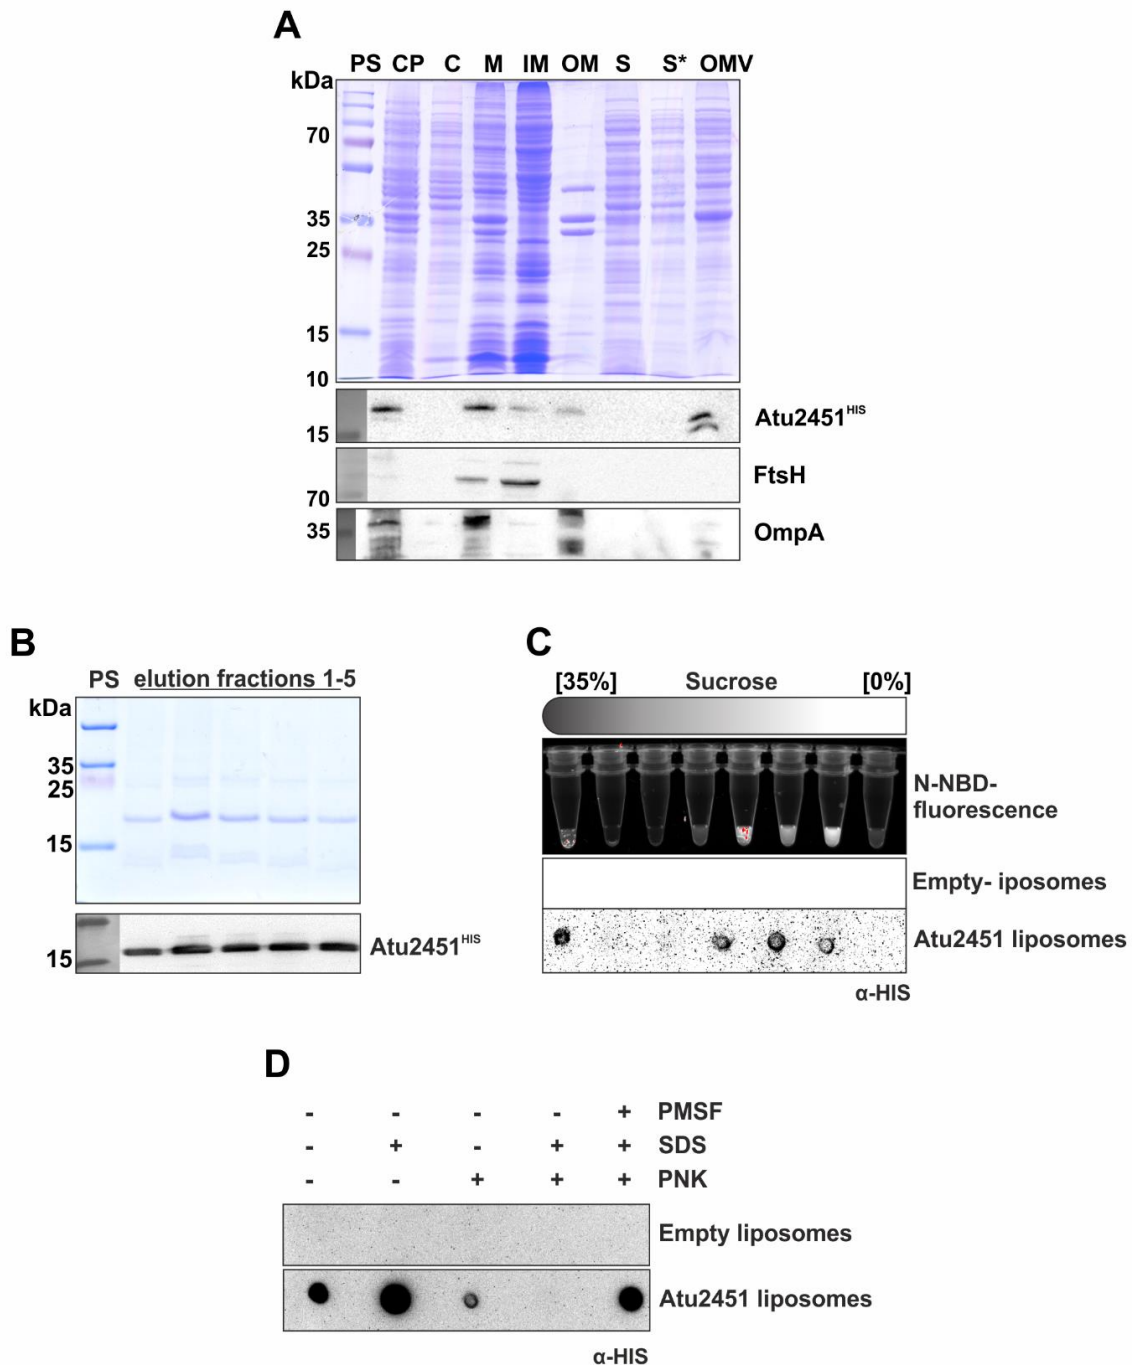

**Supplementary Figure 8. Localization, purification and reconstitution of Atu2451<sup>HIS</sup>.** (A) Localization of Atu2451<sup>HIS</sup> in *E. coli*. *E. coli* BL21 containing the pET\_atu2451 expression plasmid was cultivated in LB medium at 37°C to an OD<sub>580</sub> of 0.6. After induction with 0.4 mM IPTG, cells were cultivated for 4 h at 30°C. Cells were then harvested, disrupted and separated into cytosolic (C) and membrane fraction (M) by ultracentrifugation. The membrane fraction was treated with *N*-lauroylsarcosine for separation into inner and outer membranes (IM/OM). For the extracellular localization of proteins, the cell-free culture supernatant (S) was fractionated into secreted soluble proteins (S\*) and OMV-associated proteins (OMV) by ultracentrifugation. Atu2451 was detected with a HIS-epitope specific antibody. FtsH served as inner membrane reference protein and OmpA as outer membrane control protein. Both proteins were detected with specific antibodies. (B) SDS-PAGE and Western blot analysis of Ni-IDA purified Atu2451<sup>HIS</sup> from *E. coli* expression strains. (C) Efficiency of Atu2451<sup>HIS</sup> reconstitution in liposomes containing the reporter lipid *N*-NBD-PE was analyzed by a flotation assay of Atu2451<sup>HIS</sup> proteoliposomes in a sucrose gradient. Fractions were analyzed for NBD fluorescence (lipid marker) and protein content (Dot blot using anti-HIS antibodies). Reconstitution was evident from co-migration of phospholipid and Atu2451<sup>HIS</sup>. (D) Proteinase K (PNK)-protection assay with reconstituted liposomes. A Dot blot using anti-HIS antibodies was conducted to detect Atu2451<sup>HIS</sup> in intact or SDS-treated liposomes.



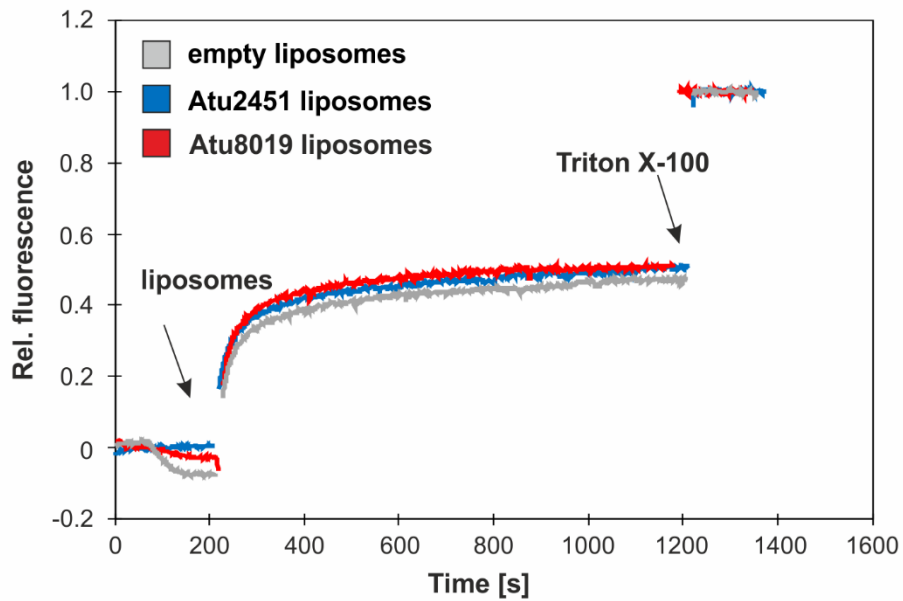

**Supplementary Figure 9. *Atu8019<sup>HIS</sup>* proteoliposomes do not disrupt artificial liposomes.** Liposome leakage assay with DOPC liposomes containing self-quenching amounts of fluorescein in the presence of different (proteo)liposomes. To prepare liposomes with self-quenching amounts of fluorescein, lipids (100  $\mu\text{g}$  DOPC) were dried under  $\text{N}_2$  flow and rehydrated in the presence of 200 mM fluorescein (in 500  $\mu\text{L}$  lysis buffer). After rehydration, liposomes were extruded through a 400 nm membrane and free dye was extracted using a PD10 column. Baseline fluorescence of 10  $\mu\text{L}$  fluorescein-containing liposomes was recorded ( $\lambda_{\text{EX}} = 488 \text{ nm}$ ,  $\lambda_{\text{EM}} = 525 \text{ nm}$ , 960  $\mu\text{L}$  TBS buffer (50 mM Tris, 150 mM NaCl, pH 8.0)), before 30  $\mu\text{L}$  *Atu8019*, *Atu2451* or empty liposomes were added. Fluorescence was recorded over 1000 s, until signal stabilized, before 0.5% Triton X-100 were added to disrupt vesicles. Fluorescence signal was normalized to the baseline fluorescence, to obtain relative fluorescence.

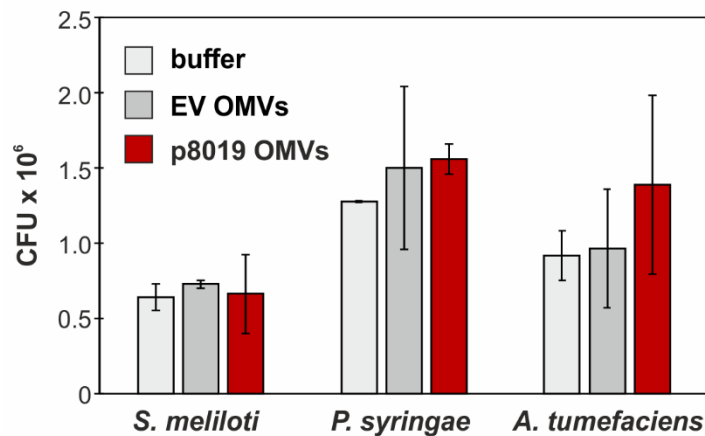

**Supplementary Figure 10. Atu8019-enriched OMVs have no inhibitory effect on target bacteria.** A mixture of target bacteria and OMVs derived from *A. tumefaciens* WT containing the empty vector (EV OMVs) or *atu8019* overexpression (p8019 OMVs) strain was prepared as described in Fig. 5. The mixture was incubated at RT for 2 h in TBS buffer. Cells incubated with TBS buffer served as negative control. 100  $\mu$ L of dilutions ( $10^{-4}$  and  $10^{-5}$ ) were plated on LB-agar plates (*A. tumefaciens*, *P. syringae*) or TY-agar plates (*S. meliloti*). After incubation for 3 days at 30°C, colony forming units were determined. Values are averages of duplicate assays and error bars are standard deviations.

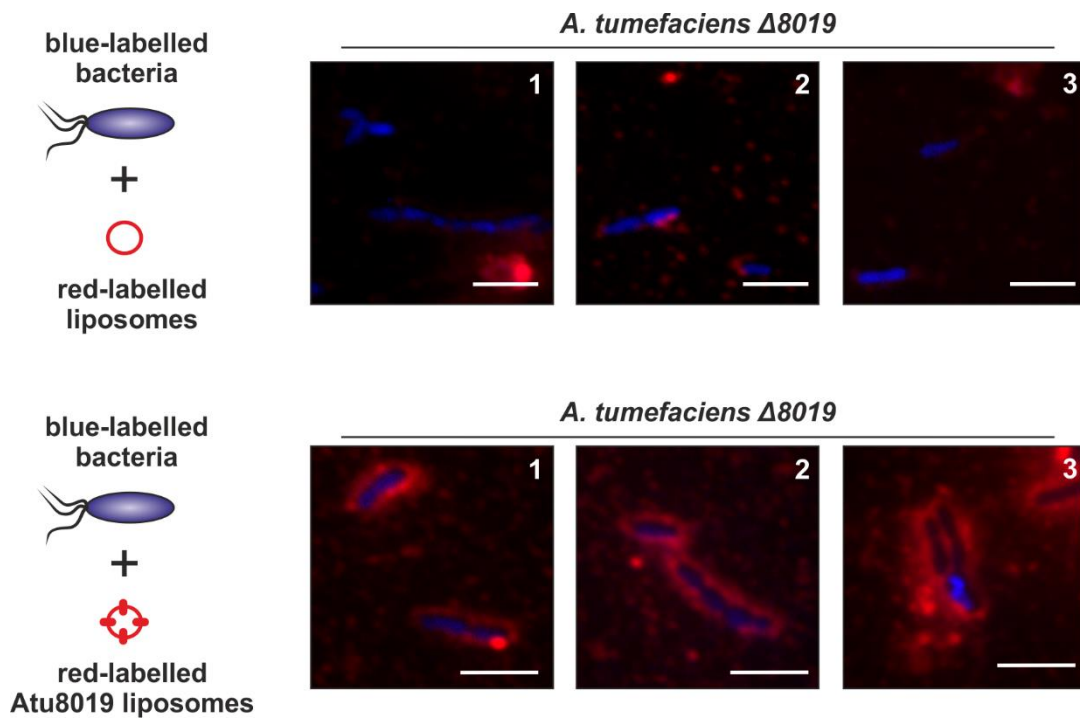

**Supplementary Figure 11. Atu8019<sup>HIS</sup> proteoliposomes interact with *A. tumefaciens* *atu8019* deletion strain.** Interaction of empty liposomes and Atu8019 proteoliposomes with the *atu8019* deletion strain. Experiment was performed as described in Fig. 8. Scale bars: 5  $\mu$ M.

## Supplementary Tables

**Supplementary Table 1. Strains and plasmids used in this study.**

| Strain                                                   | Relevant characteristic/description <sup>a</sup>                                                                | Reference                                |
|----------------------------------------------------------|-----------------------------------------------------------------------------------------------------------------|------------------------------------------|
| <b><i>E. coli</i> strains</b>                            |                                                                                                                 |                                          |
| JM83                                                     | Cloning host                                                                                                    | (Vieira & Messing, 1982)                 |
| BL21 (DE3)                                               | Expression of recombinant proteins                                                                              | (Studier & Moffatt, 1986)                |
| DH10B                                                    | Served as target bacterium                                                                                      | Stock collection Bochum, Germany         |
| <b><i>A. tumefaciens</i> strains</b>                     |                                                                                                                 |                                          |
| C58                                                      | WT, pTiC58, pAtC58                                                                                              | C. Baron                                 |
| C58 $\Delta$ <i>atu8019</i>                              | WT-derivative with <i>atu8019</i> deletion                                                                      | This study                               |
| C58 <i>atu8019</i> <sup>FLAG</sup>                       | WT-derivative, chromosomal integration of 3xFLAG-tag sequence at <i>atu8019</i> 3' end                          | This study                               |
| C58 <i>hfq</i> <sup>3xFLAG</sup>                         | Chromosomal integration of 3xFLAG-tag sequence at <i>hfq</i> 3' end                                             | (Möller <i>et al.</i> , 2014)            |
| <b>Other strains</b>                                     |                                                                                                                 |                                          |
| <i>Sinorhizobium meliloti</i> SM11                       | WT, served as target bacterium                                                                                  | Stock collection Bochum, Germany         |
| <i>Pseudomonas syringae</i> pv. tomato DC3000            | WT, Rif <sup>R</sup> , served as target bacterium                                                               | Stock collection Bochum, Germany         |
| <i>Xanthomonas campestris</i> pv. <i>campestris</i> 8004 | Wild-type; Rif <sup>R</sup> , served as target bacterium                                                        | U. Bonas, Halle-Wittenberg, Germany      |
| <i>Bacillus subtilis</i>                                 | WT, <i>trpC2</i> , served as target bacterium                                                                   | (Rahmer <i>et al.</i> , 2015)            |
| <b>Plasmids</b>                                          |                                                                                                                 |                                          |
| pET24b                                                   | Overproduction of HIS-tagged proteins, Km <sup>R</sup>                                                          | Novagen, Madison, USA                    |
| pTrc200                                                  | expression vector, pVS1 origin, <i>lacI<sub>q</sub></i> , Strep <sup>R</sup> , Spec <sup>R</sup> , trc promoter | (Schmidt-Eisenlohr <i>et al.</i> , 1999) |
| pK19mobsac                                               | suicide vector for mutagenesis, Km <sup>R</sup>                                                                 | (Schäfer <i>et al.</i> , 1994)           |
| pYP168                                                   | pUC18 derivative with reduced MCS (SmaI only), Amp <sup>R</sup>                                                 | (Hoffmann <i>et al.</i> , 2015)          |
| pYP247                                                   | pYP190 derivative carrying FLAG-KaT; Km <sup>R</sup> oriT                                                       | (Hoffmann <i>et al.</i> , 2015)          |
| pBO6100                                                  | pK19mobsacB derivative carrying the up- and downstream regions of <i>atu8019</i>                                | This study                               |
| pBO6101                                                  | pYPUB168 derivative carrying <i>atu8019</i>                                                                     | This study                               |
| pBO6102                                                  | pYP168 derivative carrying <i>atu8019</i> -FLAG; Km <sup>R</sup> oriT                                           | This study                               |
| pBO6104                                                  | Trc200 derivative encoding Atu8019C22A                                                                          | This study                               |
| pBO6121                                                  | pTrc200 derivative encoding tagless Atu8019                                                                     | This study                               |
| pBO6126                                                  | pET24b derivative carrying <i>atu8019</i>                                                                       | This study                               |
| pBO6127                                                  | pET24b derivative encoding Atu8019C22A                                                                          | This study                               |
| pBO6128                                                  | pTrc200 derivative carrying <i>atu8019</i>                                                                      | This study                               |
| pEX_8019_syn                                             | pEXA2 derivative carrying <i>atu8019</i>                                                                        | Eurofins Genomics,                       |
| pBO1920                                                  | pET24b derivative carrying <i>atu2451</i>                                                                       | This study                               |

<sup>a</sup>Amp, ampicillin; Km, kanamycin; Spec, spectinomycin; Strep, streptomycin Rif, rifampicin

**Supplementary Table 2. Oligonucleotides used in this study.**

| <b>Primer</b>                                      | <b>Oligonucleotide sequence (5' → 3')<sup>a</sup></b> |
|----------------------------------------------------|-------------------------------------------------------|
| <b>pTrc200-<i>atu8019</i> expression plasmids</b>  |                                                       |
| 8019-Nco-fw                                        | AA <u>ACCATGG</u> CUATCACACGTATTCTTTTCG               |
| 8019-Bam-rv                                        | AAAGGATCCTCAGTGGTGGTGGTGGTG                           |
| 8019-rev-mS                                        | AAAGGATCCTTAGCGGCGTGCGGC                              |
| <b>pET24b-<i>atu2451</i> expression plasmid</b>    |                                                       |
| 2451-Nde-fw                                        | AAACATATGCGTGGCGTATTTGCCGT                            |
| 2451-Xho-rv                                        | AA <u>ACTCGAG</u> GCGATATCCGCACTGCTG                  |
| <b>Site-directed mutagenesis of <i>atu8019</i></b> |                                                       |
| 8019C22A-fw                                        | GTCACCCTCAGTTCCGCGGGCAACACCATTC                       |
| 8019C22A-rv                                        | GAATGGTGTTGCCCGCGGA <u>ACTGAGGG</u> TGAC              |
| <b>Deletion mutagenesis</b>                        |                                                       |
| 8019UP-Eco-fw                                      | AAAGAATTCAGGTAAATTGCGTGATG                            |
| 8019UP-Pst-rv                                      | AAACTGCAGGTGAAACTACTCCCCTATG                          |
| 8019DWN-Pst-fw                                     | AAACTGCAGTAATCAAGGCTCCCCTC                            |
| 8019DWN-Hind-rv                                    | AAAAAGCTTAACGGGCGAATAGTCG                             |
| <b>FLAG-reporter strain</b>                        |                                                       |
| 8019flag-fw                                        | AAGCTTGCGCCACCTGCCGTCATCACG                           |
| 8019flag-rv                                        | GGGGCGGCGTGCGGCGCG                                    |
| <b>pPCR</b>                                        |                                                       |
| 3xflagfw_bamHI                                     | AAAAGGATCCGACTACAAAGACCATGACGGTG                      |
| 3xflagrv_acc65I                                    | AAAAGGTACCTCATTTATCGTCGTCATCTTTGTAG                   |
| chvE-fw                                            | GCTGTCCCAGATCGAAAA                                    |
| chvE-rv                                            | GCCTGCTTCAGAACGTC                                     |

<sup>a</sup>Restriction sites are underlined and bp-exchanges are shown in bold.

**Supplementary Table 3.** List of proteins identified by mass spectrometry in OMVs isolated from *A. tumefaciens* C58 grown in LB medium. The number (#) of replicates in which the proteins were identified with at least one peptide is given. Proteins identified in more than one replicate (gray) and Atu2451 (light blue) and Atu8019 (red) are highlighted.

| Protein identifier |      |          | Description                                          | # of replicates |
|--------------------|------|----------|------------------------------------------------------|-----------------|
| Atu0048            |      | AAK85872 | YkuD domain-containing protein                       | 2               |
| Atu0084            | RpsO | AAK85904 | 30S ribosomal protein S15                            | 2               |
| Atu0224            | CtpA | AAK86042 | components of type IV pilus pilin subunit            | 1               |
| Atu0256            | RplT | AAK86072 | 50S ribosomal protein L20                            | 1               |
| Atu0542            | Fla  | AAK86355 | flagellin                                            | 3               |
| Atu0543            | FlaB | AAK86356 | flagellin                                            | 3               |
| Atu0545            | FlaA | AAK86357 | flagellin                                            | 3               |
| Atu0552            | FlgG | AAK86364 | flagellar basal body rod protein                     | 2               |
| Atu0567            | FlaD | AAK86378 | flagellin                                            | 3               |
| Atu0574            | FlgE | AAK86385 | flagellar hook protein                               | 3               |
| Atu0575            | FlgK | AAK86386 | flagellar hook associated protein                    | 3               |
| Atu0576            | FlgL | AAK86387 | flagellin                                            | 3               |
| Atu0584            |      | AAK86395 | Rod-binding domain-containing protein                | 1               |
| Atu0650            |      | AAK86458 | uncharacterized protein                              | 3               |
| Atu0653            |      | AAK86461 | uncharacterized protein                              | 2               |
| Atu0682            | GroL | AAK86491 | 60 kDa chaperonin                                    | 3               |
| Atu0688            | TadA | AAK86497 | tRNA-specific adenosine deaminase                    | 1               |
| Atu0782            |      | AAK86591 | UPF0337 protein                                      | 1               |
| Atu0844            |      | AAK86651 | YkuD domain-containing protein                       | 1               |
| Atu0845            |      | AAK86652 | YkuD domain-containing protein                       | 2               |
| Atu1020            |      | AAK86828 | porin                                                | 3               |
| Atu1021            |      | AAK86830 | porin                                                | 3               |
| Atu1090            | RpsR | AAL42103 | 30S ribosomal protein S18                            | 1               |
| Atu1091            | RpsF | AAL42104 | 30S ribosomal protein S6                             | 1               |
| Atu1133            | RopB | AAK86934 | outer membrane protein                               | 3               |
| Atu1246            | RpsI | AAK87043 | 30S ribosomal protein S9                             | 2               |
| Atu1247            | RplM | AAK87044 | 50S ribosomal protein L13                            | 1               |
| Atu1262            | HupA | AAK87057 | histone like protein                                 | 1               |
| Atu1374            | RpsB | AAK87166 | 30S ribosomal protein S2                             | 1               |
| Atu1426            | Eno  | AAK87218 | enolase                                              | 2               |
| Atu1525            |      | AAK87316 | uncharacterized protein                              | 1               |
| Atu1577            |      | AAK87360 | ABC transporter substrate binding protein amino acid | 2               |
| Atu1664            | Tig  | AAK87437 | trigger factor                                       | 2               |
| Atu1717            | FadL | AAK87490 | long chain fatty acid transport protein              | 2               |
| Atu1770            | GlnA | AAK87539 | glutamine synthetase                                 | 2               |
| Atu1846            |      | AAK87613 | uncharacterized protein                              | 1               |
| Atu1860            | RpsD | AAK87627 | 30S ribosomal protein S4                             | 2               |
| Atu1922            | RplQ | AAK87683 | 50S ribosomal protein L17                            | 1               |
| Atu1925            | RpsM | AAK87686 | 30S ribosomal protein S13                            | 1               |
| Atu1928            | RplO | AAK87690 | 50S ribosomal protein L15                            | 1               |
| Atu1929            | RpsE | AAK87692 | 30S ribosomal protein S5                             | 2               |
| Atu1930            | RplR | AAK87693 | 50S ribosomal protein L18                            | 3               |
| Atu1932            | RpsH | AAK87695 | 30S ribosomal protein S8                             | 2               |
| Atu1936            | RplN | AAK87699 | 50S ribosomal protein L14                            | 1               |
| Atu1937            | RpsQ | AAL42933 | 30S ribosomal protein S17                            | 1               |
| Atu1939            | RplP | AAK87701 | 50S ribosomal protein L16                            | 1               |
| Atu1940            | RpsC | AAK87702 | 30S ribosomal protein S3                             | 1               |

| Protein identifier |       |          | Description                              | # of replicates |
|--------------------|-------|----------|------------------------------------------|-----------------|
| Atu1941            | RplV  | AAK87703 | 50S ribosomal protein L22                | 1               |
| Atu1942            | RpsS  | AAK87704 | 30S ribosomal protein S19                | 1               |
| Atu1943            | RplB  | AAK87705 | 50S ribosomal protein L2                 | 1               |
| Atu1944            | RplW  | AAK87706 | 50S ribosomal protein L23                | 1               |
| Atu1945            |       | AAK87707 | 50S ribosomal protein L4                 | 2               |
| Atu1946            | RplC  | AAK87708 | 50S ribosomal protein L3                 | 1               |
| Atu1947            | RpsJ  | AAK42943 | 30S ribosomal protein S10                | 1               |
| Atu1948            | TufA  | AAK87709 | elongation factor TU                     | 2               |
| Atu1950            | RpsG  | AAK87711 | 30S ribosomal protein S7                 | 1               |
| Atu1951            | RpsL  | AAK87712 | 30S ribosomal protein S12                | 1               |
| Atu1958            | RplJ  | AAK87718 | 50S ribosomal Protein L10                | 2               |
| Atu1959            | RplA  | AAK87719 | 50S ribosomal protein L1                 | 1               |
| Atu1960            | RplK  | AAK87720 | 50S Ribosomal Protein L11                | 1               |
| Atu2084            | BamD  | AAK87834 | outer membrane protein assembly factor   | 2               |
| Atu2159            | Omp   | AAK87905 | outer membrane protein                   | 2               |
| Atu2227            | RplY  | AAK87969 | 50S ribosomal protein L25                | 1               |
| Atu2439            |       | AAK88176 | uncharacterized protein                  | 1               |
| Atu2451            |       | AAK88188 | SLT domain-containing protein            | 3               |
| Atu2614            |       | AAK88336 | gly-zipper_Omp domain-containing protein | 2               |
| Atu2638            | SucC  | AAK88359 | succinyl CoA synthetase beta chain       | 1               |
| Atu2641            | Omp19 | AAK88363 | outer membrane lipoprotein               | 2               |
| Atu2699            | RpsP  | AAK88419 | 30S ribosomal protein S16                | 1               |
| Atu2703            | RplS  | AAK88423 | 50S ribosomal protein L19                | 2               |
| Atu2722            | OmpA  | AAK88440 | porin                                    | 2               |
| Atu2784            | RpmA  | AAK88499 | 50S ribosomal protein L27                | 1               |
| Atu2787            |       | AAK43768 | DUF1737 domain-containing protein        | 1               |
| Atu3052            |       | AAK90330 | transcriptional regulator MarR family    | 1               |
| Atu3091            |       | AAK90292 | uncharacterized protein                  | 2               |
| Atu3191            |       | AAK90195 | outer membrane protein                   | 2               |
| Atu3331            |       | AAK90060 | YkuD domain-containing protein           | 2               |
| Atu3642            |       | AAK89755 | VgrG protein                             | 1               |
| Atu3708            | RplD  | AAK89697 | outer surface protein                    | 2               |
| Atu3713            | PalA  | AAK89692 | peptidoglycan-associated lipoprotein     | 3               |
| Atu3714            | TolB  | AAK89691 | Tol-Pal system protein TolB              | 2               |
| Atu3737            | GapA  | AAK89669 | glyceraldehyde 3 Phosphate Dehydrogenase | 2               |
| Atu4026            |       | AAK89401 | uncharacterized protein                  | 2               |
| Atu4063            |       | AAK89365 | O-linked GlcNAc transferase              | 2               |
| Atu4064            | RpsU1 | AAK89364 | 30S ribosomal protein S21                | 1               |
| Atu4086            | IdnO  | AAK89345 | gluconate 5 dehydrogenase                | 1               |
| Atu4345            |       | AAK89095 | uncharacterized protein                  | 3               |
| Atu4347            |       | AAK89093 | uncharacterized protein                  | 3               |
| Atu4348            | VgrG  | AAK89092 | VgrG protein                             | 1               |
| Atu4350            |       | AAK89090 | Ntox15 domain-containing protein         | 1               |
| Atu4587            |       | AAK88858 | uncharacterized protein                  | 1               |
| Atu4669            |       | AAK88778 | uncharacterized protein                  | 3               |
| Atu5118            |       | AAK90492 | aminotransferase class II                | 1               |
| Atu5121            |       | AAK90495 | two component response regulator         | 1               |
| Atu5170            | AvhB9 | AAK90541 | type IV secretion protein AvhB9          | 1               |
| Atu5283            |       | AAK90659 | ECF family sigma factor                  | 1               |
| Atu5296            |       | AAK90671 | arylester hydrolase                      | 2               |
| Atu5483            |       | AAK90860 | transcriptional regulator GntR family    | 1               |
| Atu8019            |       | ABW89715 | uncharacterized protein                  | 3               |

| Protein identifier |  |          | Description             | # of replicates |
|--------------------|--|----------|-------------------------|-----------------|
| Atu8122            |  | AAK86250 | uncharacterized protein | 3               |

**Supplementary Table 4.** Details for MS-based identification of Atu8019 and Atu2451 in OMVs isolated from *A. tumefaciens* C58 grown in LB medium. For each of three independent biological replicates, the protein score derived from ProteinLynxGlobalServer (PLGS, Waters), the sequence coverage, the number of identified and theoretical tryptic peptides as well as the number of found fragment ions are given.

| Protein | Replicate | Protein Score | Sequence Coverage [%] | Identified Peptides | Theoretical Peptides | Fragment Ions |
|---------|-----------|---------------|-----------------------|---------------------|----------------------|---------------|
| Atu8019 | 1         | 19385         | 26.42                 | 1                   | 3                    | 19            |
|         | 2         | 2496          | 33.96                 | 2                   |                      | 16            |
|         | 3         | 12055         | 26.42                 | 1                   |                      | 14            |
| Atu2451 | 1         | 3952          | 30.41                 | 7                   | 14                   | 37            |
|         | 2         | 228           | 26.80                 | 5                   |                      | 18            |
|         | 3         | 9487          | 39.69                 | 6                   |                      | 48            |

**Supplementary Table 5.** Tryptic peptides identified for Atu8019. For three biological replicates, tryptic peptides identified by MS are highlighted in the protein sequence of Atu8019 (53 amino acids).

| Replicate | Peptide | Atu8019 Sequence                                                     |
|-----------|---------|----------------------------------------------------------------------|
| 1         | 1       | 1-MITRILSTVVFVALLTVVTLSSCGNTIRGVGR <b>DTANAVDATQDAGR</b> SVDRAARR-53 |
| 2         | 1       | 1-MITRILSTVVFVALLTVVTLSSCGNTIRGVGR <b>DTANAVDATQDAGR</b> SVDRAARR-53 |
|           | 2       | 1-MITRILSTVVFVALLTVVTLSSCGNTIR <b>GVGRDTANAVDATQDAGR</b> SVDRAARR-53 |
| 3         | 1       | 1-MITRILSTVVFVALLTVVTLSSCGNTIRGVGR <b>DTANAVDATQDAGR</b> SVDRAARR-53 |



## Supplementary References

- Hoffmann, M.C., Wagner, E., Langklotz, S., Pfänder, Y., Hott, S., Bandow, J.E., and Masepohl, B. (2015) Proteome profiling of the *Rhodobacter capsulatus* molybdenum response reveals a role of IscN in nitrogen fixation by Fe-nitrogenase. *J Bacteriol* **198**: 633-643.
- Möller, P., Overlöper, A., Forstner, K.U., Wen, T.N., Sharma, C.M., Lai, E.M., and Narberhaus, F. (2014) Profound impact of Hfq on nutrient acquisition, metabolism and motility in the plant pathogen *Agrobacterium tumefaciens*. *PLoS One* **9**: doi: 10.1371/journal.pone.0110427.
- Rahmer, R., Morabbi Heravi, K., and Altenbuchner, J. (2015) Construction of a super-competent *Bacillus subtilis* 168 using the  $P_{mtlA}$ -*comKS* inducible cassette. *Front Microbiol* **6**: doi: 10.3389/fmicb.2015.01431.
- Schäfer, A., Tauch, A., Jäger, W., Kalinowski, J., Thierbach, G., and Pühler, A. (1994) Small mobilizable multi-purpose cloning vectors derived from the *Escherichia coli* plasmids pK18 and pK19: selection of defined deletions in the chromosome of *Corynebacterium glutamicum*. *Gene* **145**: 69-73.
- Schmidt-Eisenlohr, H., Domke, N., Angerer, C., Wanner, G., Zambryski, P.C., and Baron, C. (1999) Vir proteins stabilize VirB5 and mediate its association with the T pilus of *Agrobacterium tumefaciens*. *J Bacteriol* **181**: 7485-7492.
- Studier, F.W., and Moffatt, B.A. (1986) Use of bacteriophage T7 RNA polymerase to direct selective high-level expression of cloned genes. *J Mol Biol* **189**: 113-130.
- Vieira, J., and Messing, J. (1982) The pUC plasmids, an M13mp7-derived system for insertion mutagenesis and sequencing with synthetic universal primers. *Gene* **19**: 259-268.
- Wu, H.Y., Liu, K.H., Wang, Y.C., Wu, J.F., Chiu, W.L., Chen, C.Y., Wu, S.H., Sheen, J., and Lai, E.M. (2014) AGROBEST: an efficient *Agrobacterium*-mediated transient expression method for versatile gene function analyses in *Arabidopsis* seedlings. *Plant Methods* **10**: doi: 10.1186/1746-4811-1110-1119.
